# Supplementary material for: Italian Validation of the Delaying Gratification Inventory in Adolescents
Source: MDPI journal article supplement (doi:10.3390/ijerph20156527), 2023-08-05
Supplement: s1 [file s1]

### Supplementary Material

**Table S1.** Descriptive statistics for the Italian Delaying Gratification Inventory (DGI).

| Factor            | Item                                                                                                 | <i>M</i> | <i>SD</i> | Skewness | Kurtosis |
|-------------------|------------------------------------------------------------------------------------------------------|----------|-----------|----------|----------|
| Food              | DGI1. I can resist junk food when I want to.                                                         | 3.66     | 1.27      | -0.55    | -0.86    |
|                   | DGI6. I would have a hard time sticking with a special, healthy diet. (R)                            | 2.80     | 1.32      | 0.17     | -1.04    |
|                   | DGI11. If my favorite food were in front of me, I would have a difficult time waiting to eat it. (R) | 3.65     | 1.25      | -0.61    | -0.65    |
|                   | DGI16. It is easy for me to resist candy and bowls of snack foods.                                   | 3.02     | 1.24      | 0.02     | -0.99    |
|                   | DGI21. Sometimes I eat until I make myself sick. (R)                                                 | 2.20     | 1.30      | 0.68     | -0.86    |
|                   | DGI26. I have always tried to eat healthy because it pays off in the long run.                       | 2.99     | 1.13      | 0.04     | -0.64    |
|                   | DGI31. Even if I am hungry, I can wait until it is meal time before eating something.                | 3.08     | 1.17      | -0.02    | -0.91    |
| Physical Pleasure | DGI2. I am able to control my physical desires.                                                      | 3.75     | 0.97      | -0.48    | -0.22    |
|                   | DGI7. I like to get to know someone before having a physical relationship.                           | 4.19     | 1.10      | -1.34    | 0.98     |
|                   | DGI12. My habit of focusing on what “feels good” has cost me in the long run. (R)                    | 3.11     | 1.06      | -0.15    | -0.36    |
|                   | DGI17. I have given up physical pleasure or comfort to reach my goals.                               | 2.82     | 1.05      | -0.01    | -0.31    |
|                   | DGI22. I prefer to explore the physical side of romantic involvements right away. (R)                | 2.43     | 1.16      | 0.35     | -0.79    |
|                   | DGI27. When faced with a physically demanding chore, I always tried to put off doing it. (R)         | 2.45     | 1.09      | 0.41     | -0.49    |
|                   | DGI32. I have lied or made excuses in order to go do something more                                  | 3.12     | 1.09      | -0.19    | -0.56    |

|                    |                                                                                               |      |      |       |       |
|--------------------|-----------------------------------------------------------------------------------------------|------|------|-------|-------|
|                    | pleasurable. (R)                                                                              |      |      |       |       |
| Social Interaction | DGI3. I hate having to take turns with other people. (R)                                      | 2.83 | 1.13 | 0.08  | -0.56 |
|                    | DGI8. Usually I try to consider how my actions affect others.                                 | 3.65 | 0.95 | -0.60 | 0.24  |
|                    | DGI13. I think that helping each other benefits society.                                      | 4.20 | 0.90 | -1.23 | 1.55  |
|                    | DGI18. I try to consider how my actions will affect other people in the long-term.            | 3.49 | 0.99 | -0.54 | 0.08  |
|                    | DGI23. I do not consider how my behavior affects other people. (R)                            | 2.15 | 1.02 | 0.60  | -0.22 |
|                    | DGI28. I value the needs of other people around me.                                           | 3.53 | 0.91 | -0.48 | 0.11  |
|                    | DGI33. There is no point in considering how my decisions affect other people. (R)             | 2.18 | 1.02 | 0.49  | -0.52 |
| Money              | DGI4. When I am able to, I try to save away a little money in case an emergency should arise. | 3.57 | 1.26 | -0.52 | -0.83 |
|                    | DGI9. It is hard for me to resist buying things I cannot afford. (R)                          | 2.52 | 1.20 | 0.43  | -0.75 |
|                    | DGI14. I try to spend my money wisely.                                                        | 3.69 | 1.08 | -0.59 | -0.27 |
|                    | DGI19. I cannot be trusted with money. (R)                                                    | 1.90 | 1.09 | 1.15  | 0.65  |
|                    | DGI24. When someone gives me money, I prefer to spend it right away. (R)                      | 1.99 | 1.08 | 0.99  | 0.38  |
|                    | DGI29. I manage my money well.                                                                | 3.64 | 1.05 | -0.59 | -0.14 |
|                    | DGI34. I enjoy spending money the moment I get it. (R)                                        | 2.41 | 1.15 | 0.46  | -0.63 |
| Achievement        | DGI5. I worked hard in school to improve myself as a person.                                  | 3.31 | 1.12 | -0.22 | -0.66 |
|                    | DGI10. I have tried to work hard in school so that I could have a better future.              | 3.50 | 1.11 | -0.40 | -0.50 |
|                    | DGI15. In school, I tried to take the easy way out. (R)                                       | 2.77 | 1.22 | 0.23  | -0.85 |
|                    | DGI20. I am capable of working hard to get ahead in life.                                     | 3.75 | 0.98 | -0.69 | 0.21  |
|                    | DGI25. I cannot motivate myself to accomplish long-term goals. (R)                            | 2.36 | 1.13 | 0.35  | -0.71 |

|                                                                       |      |      |       |       |
|-----------------------------------------------------------------------|------|------|-------|-------|
| DGI30. I have always felt like my hard work would pay off in the end. | 3.73 | 1.05 | -0.56 | -0.26 |
| DGI35. I would rather take the easy road in life than get ahead. (R)  | 2.15 | 1.02 | 0.60  | -0.23 |

Note: The “(R)” at the end of the item indicates this item should be reversely scored in calculating total score.

**Table S2.** Polychoric correlations between Italian DGI Food subscale items.

|                          | 1    | 2    | 3    | 4    | 5    | 6    | 7    |
|--------------------------|------|------|------|------|------|------|------|
| 1. DGI1                  | —    |      |      |      |      |      |      |
| 2. DGI6 (R)              | 0.26 | —    |      |      |      |      |      |
| 3. DGI11 (R)             | 0.28 | 0.28 | —    |      |      |      |      |
| 4. DGI16                 | 0.24 | 0.16 | 0.21 | —    |      |      |      |
| 5. DGI21 (R)             | 0.25 | 0.18 | 0.16 | 0.17 | —    |      |      |
| 6. DGI26                 | 0.31 | 0.40 | 0.18 | 0.37 | 0.23 | —    |      |
| 7. DGI31                 | 0.23 | 0.25 | 0.21 | 0.13 | 0.22 | 0.22 | —    |
| 8. Item-rest correlation | 0.44 | 0.43 | 0.36 | 0.35 | 0.33 | 0.48 | 0.34 |

Note: The “(R)” at the end of the item indicates this item was reversely scored.



**Table S3.** Polychoric correlations between Italian DGI Social Interaction subscale items.

|                          | 1    | 2    | 3    | 4    | 5    | 6    | 7    |
|--------------------------|------|------|------|------|------|------|------|
| 1. DGI3 (R)              | —    |      |      |      |      |      |      |
| 2. DGI8                  | 0.23 | —    |      |      |      |      |      |
| 3. DGI13                 | 0.14 | 0.28 | —    |      |      |      |      |
| 4. DGI18                 | 0.18 | 0.58 | 0.28 | —    |      |      |      |
| 5. DGI23 (R)             | 0.27 | 0.46 | 0.29 | 0.49 | —    |      |      |
| 6. DGI28                 | 0.15 | 0.36 | 0.36 | 0.35 | 0.34 | —    |      |
| 7. DGI33 (R)             | 0.21 | 0.45 | 0.33 | 0.45 | 0.54 | 0.41 | —    |
| 8. Item-rest correlation | 0.28 | 0.60 | 0.41 | 0.59 | 0.61 | 0.49 | 0.61 |

Note: The “(R)” at the end of the item indicates this item was reversely scored.

**Table S4.** Polychoric correlations between Italian DGI Money subscale items.

|                          | 1    | 2    | 3    | 4    | 5    | 6    | 7    |
|--------------------------|------|------|------|------|------|------|------|
| 1. DGI4                  | —    |      |      |      |      |      |      |
| 2. DGI9 (R)              | 0.19 | —    |      |      |      |      |      |
| 3. DGI14                 | 0.48 | 0.38 | —    |      |      |      |      |
| 4. DGI19 (R)             | 0.33 | 0.39 | 0.46 | —    |      |      |      |
| 5. DGI24 (R)             | 0.47 | 0.34 | 0.52 | 0.50 | —    |      |      |
| 6. DGI29                 | 0.44 | 0.30 | 0.58 | 0.47 | 0.52 | —    |      |
| 7. DGI34 (R)             | 0.43 | 0.33 | 0.46 | 0.41 | 0.65 | 0.42 | —    |
| 8. Item-rest correlation | 0.53 | 0.43 | 0.67 | 0.59 | 0.70 | 0.63 | 0.63 |

Note: The “(R)” at the end of the item indicates this item was reversely scored.

**Table S5.** Polychoric correlations between Italian DGI Achievement subscale items.

|                          | 1    | 2    | 3    | 4    | 5    | 6    | 7    |
|--------------------------|------|------|------|------|------|------|------|
| 1. DGI5                  | —    |      |      |      |      |      |      |
| 2. DGI10                 | 0.67 | —    |      |      |      |      |      |
| 3. DGI15 (R)             | 0.49 | 0.49 | —    |      |      |      |      |
| 4. DGI20                 | 0.42 | 0.42 | 0.28 | —    |      |      |      |
| 5. DGI25 (R)             | 0.33 | 0.37 | 0.32 | 0.36 | —    |      |      |
| 6. DGI30                 | 0.41 | 0.41 | 0.29 | 0.48 | 0.43 | —    |      |
| 7. DGI35 (R)             | 0.37 | 0.32 | 0.41 | 0.37 | 0.44 | 0.43 | —    |
| 8. Item-rest correlation | 0.64 | 0.64 | 0.53 | 0.55 | 0.52 | 0.58 | 0.55 |

Note: The “(R)” at the end of the item indicates this item was reversely scored.

**Table S6.** Polychoric correlations between Italian DGI Physical Pleasure subscale items.

|                          | 1    | 2    | 3     | 4     | 5     | 6    | 7    |
|--------------------------|------|------|-------|-------|-------|------|------|
| 1. DGI2                  | —    |      |       |       |       |      |      |
| 2. DGI7                  | 0.18 | —    |       |       |       |      |      |
| 3. DGI12 (R)             | 0.12 | 0.04 | —     |       |       |      |      |
| 4. DGI17                 | 0.09 | 0.16 | -0.10 | —     |       |      |      |
| 5. DGI22 (R)             | 0.14 | 0.46 | 0.07  | 0.07  | —     |      |      |
| 6. DGI27 (R)             | 0.08 | 0.10 | 0.07  | -0.06 | -0.03 | —    |      |
| 7. DGI32 (R)             | 0.05 | 0.12 | 0.09  | 0.02  | 0.21  | 0.06 | —    |
| 8. Item-rest correlation | 0.23 | 0.38 | 0.09  | 0.06  | 0.32  | 0.0  | 0.19 |

Note: The “(R)” at the end of the item indicates this item was reversely scored.

## DGI-35

(traduzione a cura di A. Lis e E. Delvecchio)

Legga attentamente ciascuna affermazione e indichi quanto accuratamente ciascun item la descrive segnando con una crocetta (X) il numero appropriato per ogni affermazione. Non impieghi troppo tempo per ogni affermazione e risponda velocemente e onestamente secondo la seguente scala:

1-----2-----3-----4-----5  
 Per niente Né d'accordo Molto  
 d'accordo né in disaccordo d'accordo

|                                                                                                                     |   |   |   |   |   |
|---------------------------------------------------------------------------------------------------------------------|---|---|---|---|---|
| 1. Se lo voglio, posso resistere al cibo spazzatura                                                                 | 1 | 2 | 3 | 4 | 5 |
| 2. Sono capace di controllare i miei bisogni fisici                                                                 | 1 | 2 | 3 | 4 | 5 |
| 3. Odio dover fare a turno con altre persone                                                                        | 1 | 2 | 3 | 4 | 5 |
| 4. Quando mi è possibile, cerco di mettere via un po' di denaro nel caso in cui possa verificarsi qualche emergenza | 1 | 2 | 3 | 4 | 5 |
| 5. Lavoro molto duramente a scuola per migliorarmi come persona                                                     | 1 | 2 | 3 | 4 | 5 |
| 6. Faccio molta fatica ad aderire a una dieta particolare e salutare                                                | 1 | 2 | 3 | 4 | 5 |
| 7. Mi piace conoscere qualcuno/a prima di avere con lui/lei una relazione fisica                                    | 1 | 2 | 3 | 4 | 5 |
| 8. Di solito cerco di tenere in considerazione come le mie azioni possono influenzare gli altri                     | 1 | 2 | 3 | 4 | 5 |
| 9. Anche se non posso permettermi delle cose, mi è difficile resistere a comperarle                                 | 1 | 2 | 3 | 4 | 5 |
| 10. Ho cercato di lavorare duramente a scuola per potere avere un futuro migliore                                   | 1 | 2 | 3 | 4 | 5 |
| 11. Se avessi davanti a me il mio cibo favorito mi sarebbe difficile attendere a mangiarlo                          | 1 | 2 | 3 | 4 | 5 |
| 12. La mia abitudine di focalizzarmi su ciò che "mi fa sentire bene", ha avuto delle conseguenze a lungo andare     | 1 | 2 | 3 | 4 | 5 |
| 13. Credo che aiutarsi uno con l'altro rappresenti un beneficio per la società                                      | 1 | 2 | 3 | 4 | 5 |
| 14. Cerco di spendere il mio denaro in modo saggio                                                                  | 1 | 2 | 3 | 4 | 5 |
| 15. A scuola ho sempre cercato di cavarmela nel modo più facile o con delle scappatoie                              | 1 | 2 | 3 | 4 | 5 |
| 16. Mi risulta facile resistere a dolci e/o snack anche in grandi quantità                                          | 1 | 2 | 3 | 4 | 5 |
| 17. Ho rinunciato al conforto o al piacere fisico per raggiungere il mio scopo                                      | 1 | 2 | 3 | 4 | 5 |

|                                                                                                            |   |   |   |   |   |
|------------------------------------------------------------------------------------------------------------|---|---|---|---|---|
| 18. Cerco di tenere in considerazione come le mie azioni, a lungo termine, potrebbero influire sugli altri | 1 | 2 | 3 | 4 | 5 |
| 19. Per quanto riguarda il denaro non c'è da fidarsi di me                                                 | 1 | 2 | 3 | 4 | 5 |
| 20. Sono capace di lavorare duramente per farmi strada nella vita                                          | 1 | 2 | 3 | 4 | 5 |
| 21. Qualche volta mangio fino a sentirmi male                                                              | 1 | 2 | 3 | 4 | 5 |
| 22. Preferisco esplorare immediatamente l'aspetto fisico del coinvolgimento romantico                      | 1 | 2 | 3 | 4 | 5 |
| 23. Non tengo in considerazione come il mio comportamento possa influenzare gli altri                      | 1 | 2 | 3 | 4 | 5 |
| 24. Quando qualcuno mi dà del denaro preferisco spenderlo immediatamente                                   | 1 | 2 | 3 | 4 | 5 |
| 25. Non riesco a motivarmi per raggiungere obiettivi a lungo termine                                       | 1 | 2 | 3 | 4 | 5 |
| 26. Ho sempre cercato di mangiare sano perché questo ti ripaga a lungo andare                              | 1 | 2 | 3 | 4 | 5 |
| 27. Quando mi confronto con incombenze che richiedono un impegno fisico, cerco subito di rimandarle        | 1 | 2 | 3 | 4 | 5 |
| 28. Tengo molto in considerazione i bisogni delle persone che mi circondano                                | 1 | 2 | 3 | 4 | 5 |
| 29. So gestire bene il mio denaro                                                                          | 1 | 2 | 3 | 4 | 5 |
| 30. Ho sempre creduto che il mio duro lavoro alla fine mi ripagherà                                        | 1 | 2 | 3 | 4 | 5 |
| 31. Anche se ho fame, posso aspettare fino al momento del pasto prima di mangiare qualcosa                 | 1 | 2 | 3 | 4 | 5 |
| 32. Ho mentito o mi sono scusato per ottenere qualcosa di più piacevole                                    | 1 | 2 | 3 | 4 | 5 |
| 33. Non vale la pena pensare a come le mie decisioni potrebbero influenzare gli altri                      | 1 | 2 | 3 | 4 | 5 |
| 34. Mi piace spendere il denaro nel momento in cui ce l'ho                                                 | 1 | 2 | 3 | 4 | 5 |
| 35. Preferisco intraprendere una strada facile, piuttosto che farmi strada nella vita                      | 1 | 2 | 3 | 4 | 5 |

Note: items in red refer to Physical Pleasure
